# Supplementary material
Source: MDPI journal article supplement (https://www.mdpi.com/2071-1050/12/19/8250)
Supplement: s1 [file s1]

## Supplementary Files

### Supplementary Material 1. Some relevant reviewed literature for the adoption of research outcomes in policies and plans.

| Author/s                     | Coverage                                                                                                                                                  |
|------------------------------|-----------------------------------------------------------------------------------------------------------------------------------------------------------|
| (Torres and Hanley 2017)     | Review articles: Marine and Protected Area                                                                                                                |
| (Marre et al. 2016)          | Australia: coastal and marine management                                                                                                                  |
| (Martinez-Harms et al. 2015) | Review articles: Five Filters                                                                                                                             |
| (Rogers 2015)                | Australia and New Zealand: non-market goods valuation and policy reflection                                                                               |
| (Waite 2015)                 | Caribbean region: marine ecosystem                                                                                                                        |
| (Dehnhardt 2013)             | Germany: attitude towards economic valuation for water management                                                                                         |
| (Raymond et al. 2009)        | Myponga Reservoir, Australia: identification of policy mix for agriculture pollution                                                                      |
| (Rosenthal et al. 2015)      | Indonesia, Belize, Colombia, India, Borneo, Latin America: guiding steps for ES policy adoption                                                           |
| (Verberg et al. 2016)        | UK, Belgium, Netherland: governing ecosystem services: national and local lessons from policy appraisal and implementation                                |
| (Spangenberg et al. 2016)    | Global: review                                                                                                                                            |
| (Posner et al. 2016)         | Global 15 cases: policy impacts of ecosystem services knowledge (new)                                                                                     |
| (Bryan and Kandulu 2010)     | Australia: face-to-face interview/deliberative multi-criteria analysis                                                                                    |
| (Pittcock et al. 2012)       | Australia: the state of the application of ecosystems services in Australia                                                                               |
| (Ojha et al. 2020)           | Nepal: improving science-policy interface: lessons from the policy lab methodology in Nepal's community forest governance                                 |
| (Bouwma et al. 2018)         | European Union: adoption of the ecosystem services concept in EU policies                                                                                 |
| (Keenan et al. 2019)         | Australia: opportunities and barriers to adopt ES policies                                                                                                |
| (Jax et al. 2018)            | EU: lessons learnt from 27 case study applications are synthesized in a set of guiding principles of Natural Capital Projects                             |
| (Ruckelshaus et al. 2015)    | Indonesia, Belize, China, USA, Canada, Columbia etc.: lessons learned from using ecosystem service approaches to inform real-world decisions              |
| (Opperman et al. 2020)       | Mekong region river system: some examples (new)                                                                                                           |
| (Vogl et al. 2017)           | Watershed services: mainstreaming investments in watershed services to enhance water security: barriers and opportunities (new)                           |
| (Podolak et al. 2017)        | USA: informing watershed planning and policy in the Truckee River basin through stakeholder engagement, scenario development, and impact evaluation (new) |
| (Posner et al. 2016)         | USA: evaluating the impact of ecosystem service assessments on decision-makers: by comparison of impact of ES assessment (new)                            |

## Supplementary Material 2: Checklist for national level expert consultation

### Checklist for National Level Expert Consultation

#### SECTION 1: PERSONAL INFORMATION

Name: ..... Sex (tick): Male: ☐ Female: ☐ Age: .....

Position: ..... Organisation: ..... Working since: .....

Sector:

Education (tick as appropriate): 10+2: ☐ Bachelor: ☐ Master: ☐ PhD: ☐

Field of Expertise:

#### Section 2: Ecosystem services related knowledge and experiences

1. Do you involve in natural resource management/ecosystem services related research? If yes, how many years you have been involved for and where?
2. I hope you have numbers of publications in natural resource management/ecosystem services issues, are your research outcomes reflected in policies and plans in the context of Nepal?
3. How did you conduct the research and to whom you mostly engaged during your research?
4. Could you please explain how can research outcomes be reflected in the policies and plans?
5. Among your research outcomes, how many of your outcomes are reflected in the policy and plans in the context of Nepal?
6. What are the ecosystem services knowledge gaps in Nepal in general and particularly in developing countries?

7. Do you think the current ES research appropriate for policy inputs or decision making?
8. If not, why research outcomes are not integrated into policy process? How can we incorporate the outcomes in the policies and management plans?
9. Further, could you please advise an appropriate mechanism how these research outcomes can better be incorporated in the policy and plans?
10. Any other important issues you would like to add?

*Thank you very much for your time and inputs!!*
